# Supplementary figures and images for: A multiplexed tension sensor reveals the distinct levels of integrin-mediated forces in adherent cells
Source: Royal Society of Chemistry journal article supplement (doi:10.1039/d4ma00600c), 2024-01-01

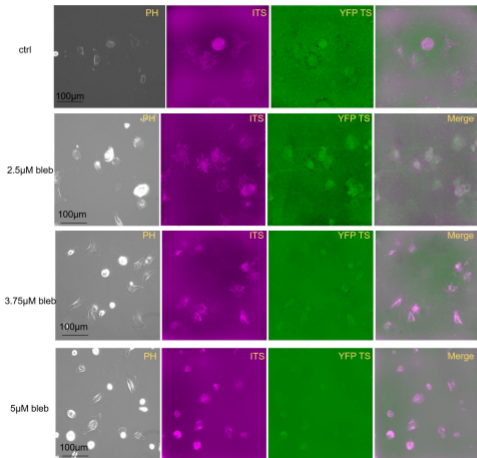

Supplement: d4ma00600c1.pdf [file d4ma00600c1.pdf]

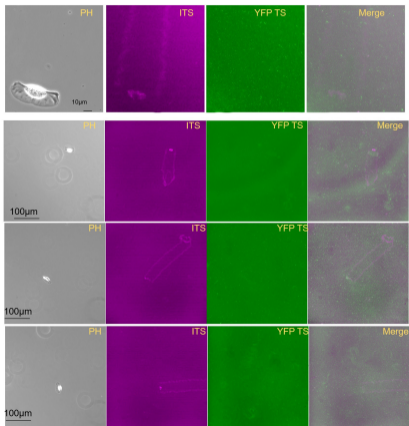

Supplement: d4ma00600c2.pdf [file d4ma00600c2.pdf]

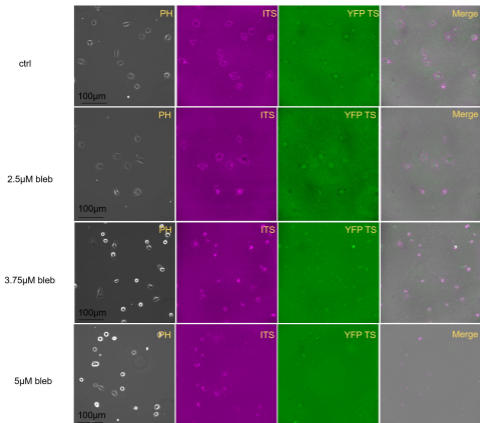

Supplement: d4ma00600c3.pdf [file d4ma00600c3.pdf]

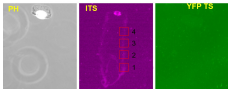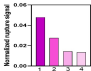

Supplement: d4ma00600c4.pdf [file d4ma00600c4.pdf]
